# Supplementary material for: The high alpine bee fauna (Hymenoptera: Apoidea) of the Zillertal Alps, Austria
Source: Biodivers Data J. 2014 Jun 23;(2):e1115. doi: 10.3897/BDJ.2.e1115 (PMC4092322; doi:10.3897/BDJ.2.e1115)
Supplement: Supplementary material 1 — Plant species and flower visiting bee species [file biodiversity_data_journal-2-e1115-s001.xlsx]

## Sheet: Tabelle1
Plant family	Plant species	Flower visiting bee species
Rosaceae	Geum urbanum L.	Hylaeus nivalis (Morawitz)
	Geum urbanum L.	Andrena ruficrus Nylander
	Potentilla sp.	Panurginus montanus Giraud
	Potentilla sp.	Lasioglossum fratellum (Pérez)
Asteraceae	Leontodon hispidus L.	Hylaeus nivalis (Morawitz)
	Leontodon hispidus L.	Andrena coitana (Kirby)
	Leontodon hispidus L.	Panurginus montanus Giraud
	Leontodon hispidus L.	Lasioglossum alpigenum (Dalla Torre)
	Leontodon hispidus L.	Lasioglossum morio (Fabr.)
	Leontodon hispidus L.	Dufourea alpina Morawitz
	Leontodon hispidus L.	Dufourea paradoxa Morawitz
	Leontodon helveticus Mérat	Hylaeus nivalis (Morawitz)
	Leontodon sp.	Lasioglossum fratellum (Pérez)
	Leontodon sp.	Dufourea alpina Morawitz
	Leontodon sp.	Osmia villosa (Schenck)
	Leontodon sp.	Lasioglossum albipes (Fabr.)
Campanulaceae	Campanula barbata L.	Hylaeus nivalis (Morawitz)
	Campanula barbata L.	Bombus hortorum (L.)
	Campanula barbata L.	Bombus pratorum (L.)
	Campanula barbata L.	Bombus pyrenaeus Pérez
	Campanula sp.	Bombus pyrenaeus Pérez
	Phyteuma sp.	Dufourea alpina Morawitz
Boraginaceae	Myosotis sp.	Lasioglossum fratellum (Pérez)
Gentianaceae	Gentiana acaulis L.	Lasioglossum morio (Fabr.)
Ericaceae	Rhododendron ferrugineum L.	Bombus cryptarum (Fabr.)
Ranunculaceae	Aconitum napellus L.	Bombus gerstaeckeri Morawitz
Orobanchiaceae	Rhinanthus glacialis Personnat	Bombus monticola Smith
	Rhinanthus glacialis Personnat	Bombus wurflenii Radoszkowski
