# Supplementary material for: The high alpine bee fauna (Hymenoptera: Apoidea) of the Zillertal Alps, Austria
Source: Biodivers Data J. 2014 Jun 23;(2):e1115. doi: 10.3897/BDJ.2.e1115 (PMC4092322; doi:10.3897/BDJ.2.e1115)
Supplement: Supplementary material 2 — Partial COI sequence of the Bombus cryptarum voucher [file biodiversity_data_journal-2-e1115-s002.fas]

>Bombus_cryptarum_voucher
TCATCTATAAGTTTATTAATTCGAATAGAATTAAGTCATCCTGGAATATGAATTAATAAT
GATCAAATTTATAATTCTTTAGTAACTAGACATGCATTTTTAATAATTTTTTTTATAGTA
ATACCATTTATAATTGGAGGATTTGGAAATTATTTAATTCCATTAATATTAGGATCTCCA
GATATAGCTTTCCCTCGAATAAATAATATTAGATTTTGACTTTTACCTCCATCATTATTT
ATACTTTTACTAAGAAATATATTTACACCTAATGTAGGAACAGGATGAACTGTATATCCT
CCTTTATCTTCTTATTTATTTCACTCATCACCATCAATTGATATTGCAATTTTTTCTTTA
CATATATCAGGAATTTCTTCTATTATTGGATCATTAAATTTTATTGTTACTATTTTAATA
ATAAAAAATTTTTCATTAAATTATGATCAAATTAATTTATTTTCATGATCAGTATGTATT
ACTGTAATTTTATTAATTTTATCCTTACCAGTATTAGCAGGAGCAATTACAATATTACTT
TTTGATCGAAATTTTAATACTTCATTTTTTGATCCTATAGGAGGAGGAGATCCAATTTTA
TATCAACAT
